# Supplementary material
Source: publisher figshare collection journal article supplement (https://acs.figshare.com/ndownloader/files/7677247)

## *Supporting Information*

### **Transition-Metal-Free Oxidative Decarboxylative Cross Coupling of $\alpha$ , $\beta$ -Unsaturated Carboxylic Acids with Cyclic Ethers under Air Conditions: Mild Synthesis of $\alpha$ -Oxyalkyl Ketones**

Peng-Yi Ji, Yu-Feng Liu, Jing-Wen Xu, Wei-Ping Luo, Qiang Liu, Can-Cheng Guo\*

College of Chemistry and Chemical Engineering, Advanced Catalytic Engineering

Research Center of the Ministry of Education, Hunan University, Changsha 410082,

China

E-mail: [ccguo@hnu.edu.cn](mailto:ccguo@hnu.edu.cn)

## **Table of Contents**

|                                              |               |
|----------------------------------------------|---------------|
| <b>Radical Trapping Experiment</b>           | <b>S2</b>     |
| <b>Additional Experiments for Mechanism:</b> | <b>S3</b>     |
| <b>Control Experiments for Mechanism</b>     | <b>S3</b>     |
| <b>NMR Spectra for compound D</b>            | <b>S4</b>     |
| <b>NMR Spectra for Ketone Products</b>       | <b>S5-S22</b> |

### Scheme S1. Radical Trapping Experiment:

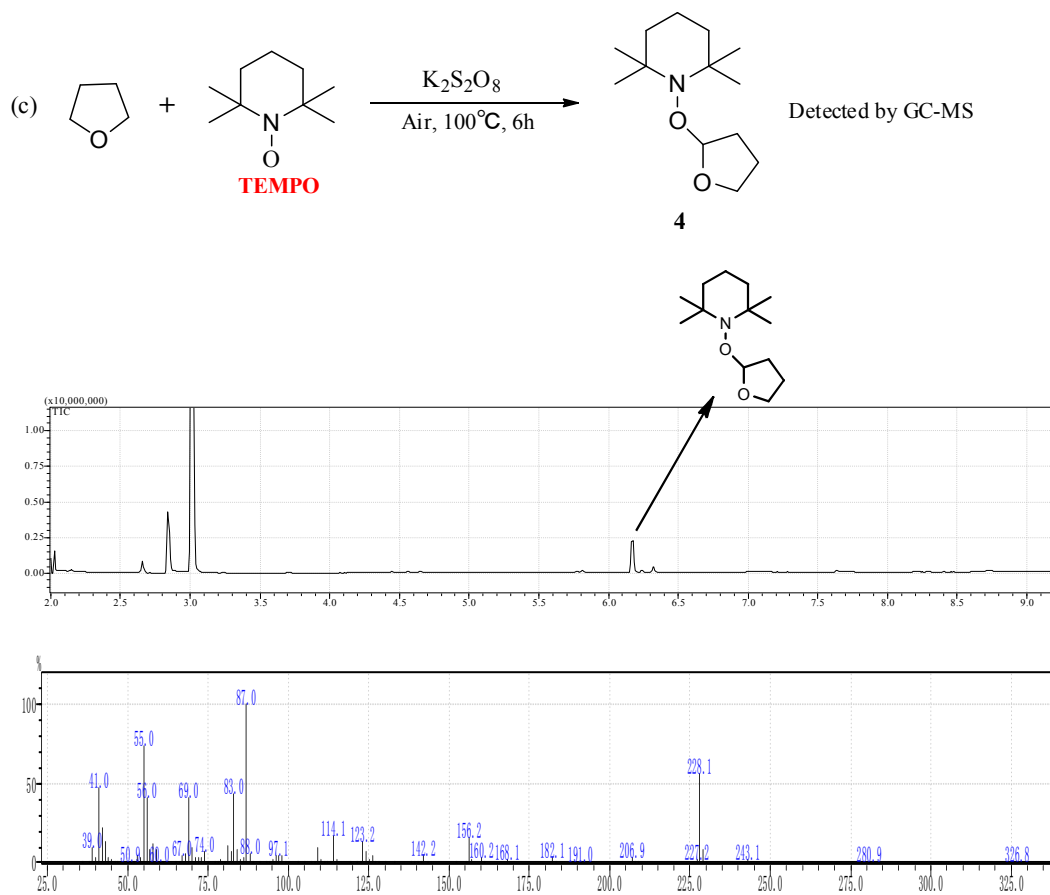

**General Procedure:** To a 20 mL Schlenk tube was added 2,2,6,6-tetramethyl-1-piperidinyloxy TEMPO (62.8 mg, 0.4 mmol),  $K_2S_2O_8$  (90.8 mg, 0.4 mmol), tetrahydrofuran (1.5 ml). The reaction mixture was stirred at 100 °C for 6 h in sealed conditions. Upon completion of the reaction, the resulting mixture was dilute by EtOAc and washed with equal amounts of saturated  $NaHCO_3$  solution, then the organic phase was separated and washed with water, and the water phase was extracted by EtOAc for three times. All organic phase thus obtained were dried over anhydrous  $Na_2SO_4$  and filtered. The resulting mixture was analyzed by GC-MS.

### Scheme S2.1. Additional Experiments for Mechanism:

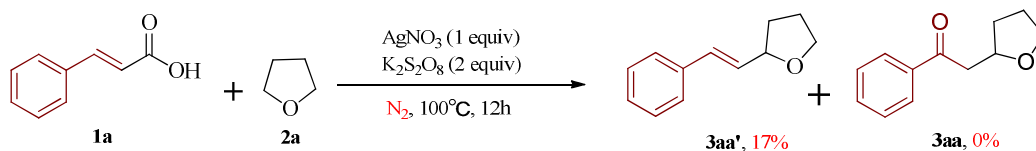

In the appearing of 1 equiv of  $\text{AgNO}_3$ , the model reaction was able to produce alkenylation product 3aa' in isolated 17% yields under  $\text{N}_2$  atmosphere, what's more, there is no ketone products were found in the reaction solution.

### Scheme S2.2. Additional Experiments about the Alkylation Product 3aa':

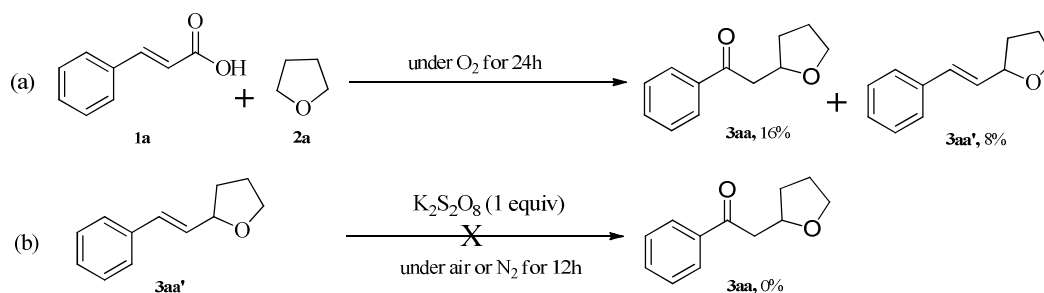

After the model reaction was conducted only with the existence of  $\text{O}_2$  for 24h two kinds of products were obtained in about 16% and 8% yields, which implied the reaction was undergone an alkylation intermediate 3aa' to form the ketone product, then 3aa' was employed as the substrates, but there had no ketone products formed.

### Scheme S3. Control Experiments for Mechanism:

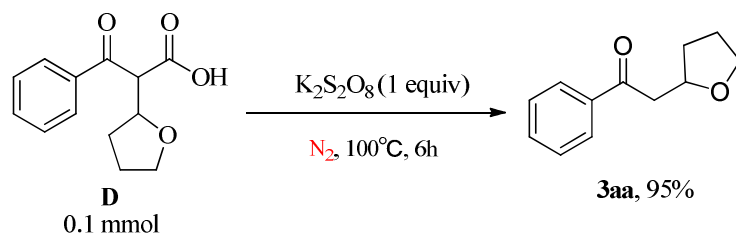

In the presence of 1 equiv of  $\text{K}_2\text{S}_2\text{O}_8$ , Intermediate acid **D** (0.1 mmol, 23.4 mg) was able to transform into the desired product 3aa in 95% yields under nitrogen and thermal conditions. The synthesis of intermediate acid **D** was according to ref 17 and 14b.

# NMR Spectra for compound D:

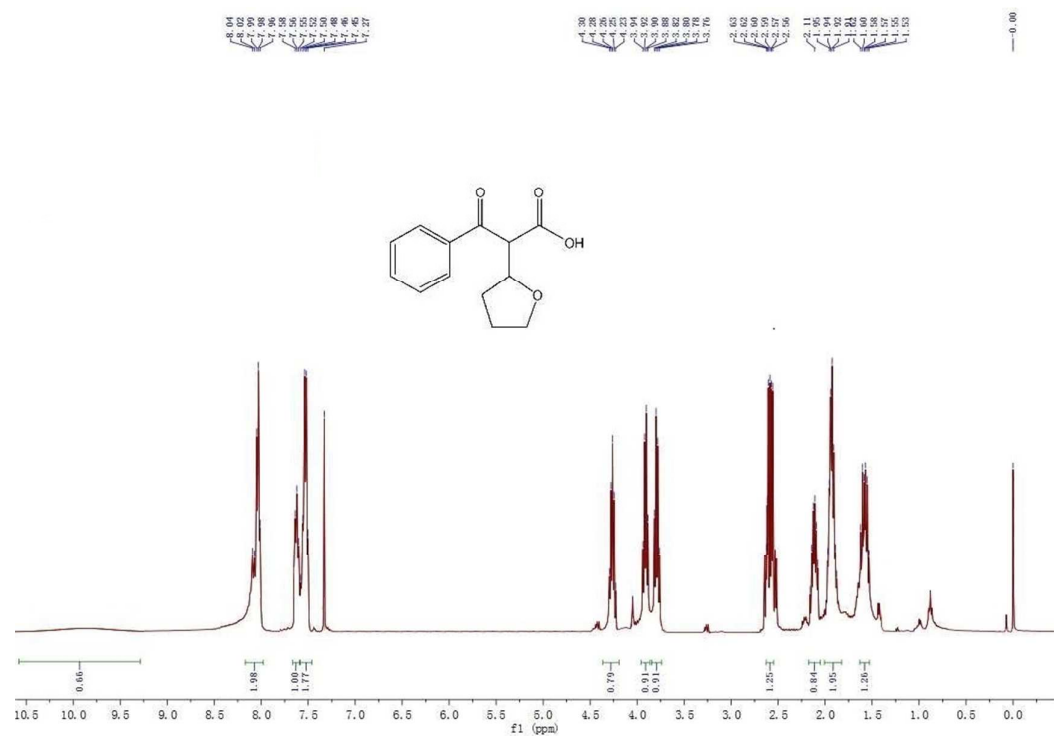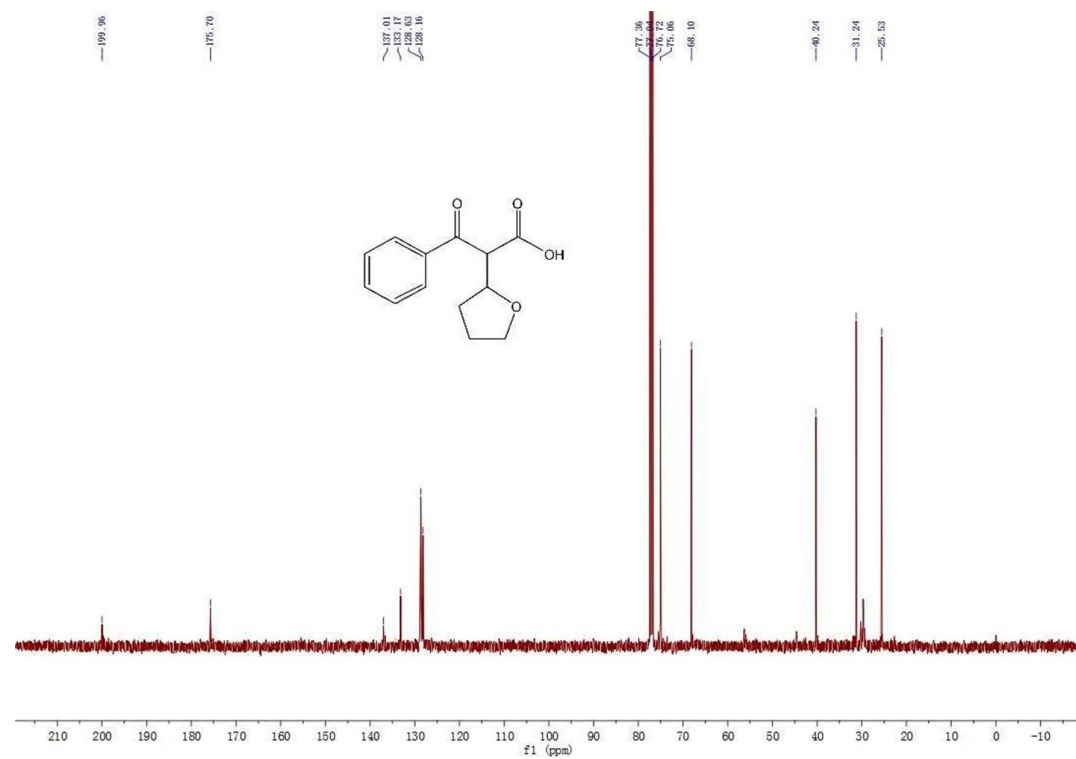

# NMR Spectra for 3aa

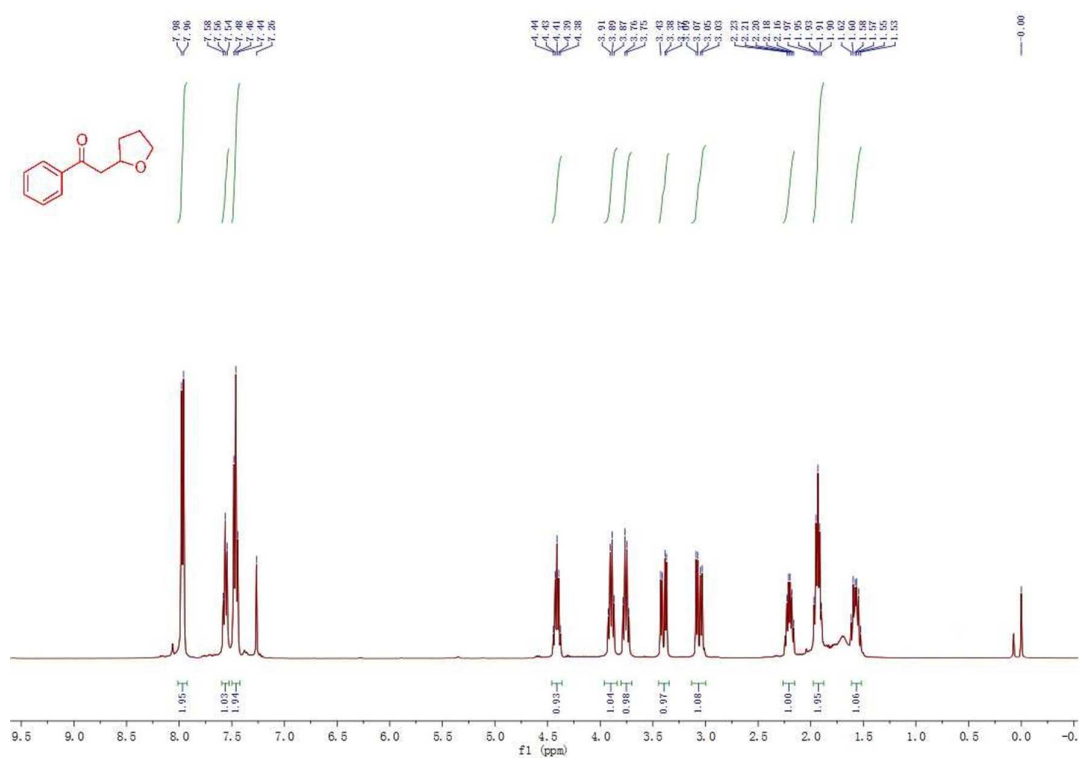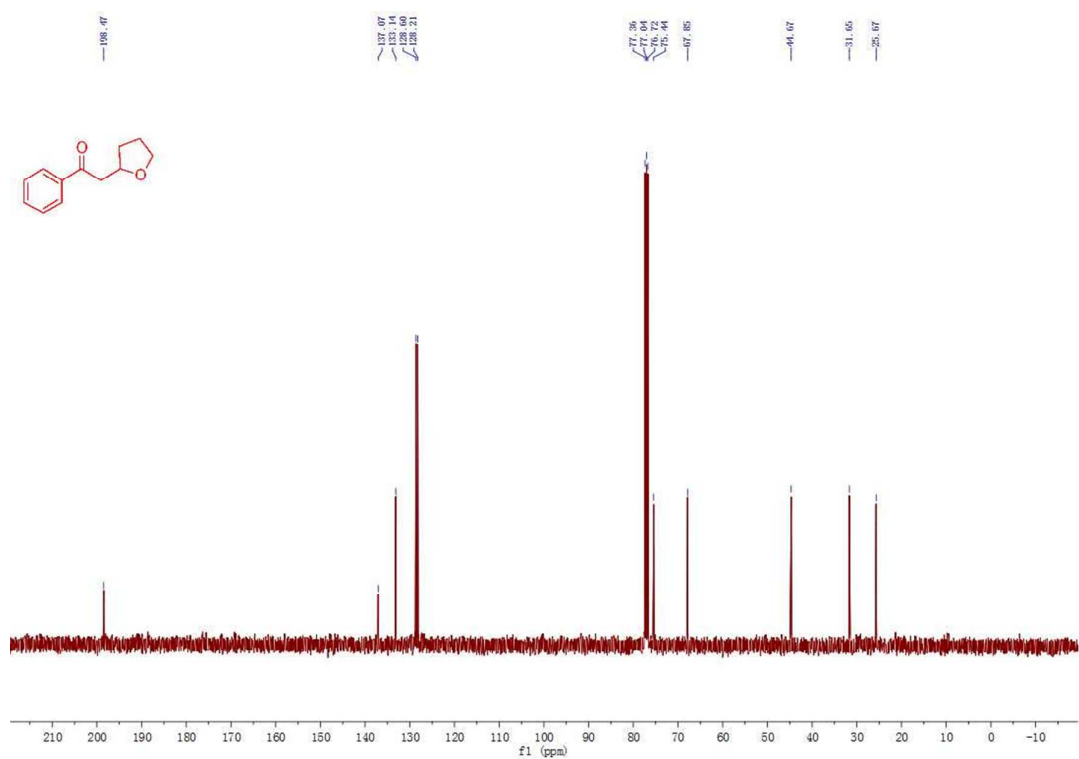

# NMR Spectra for 3ba

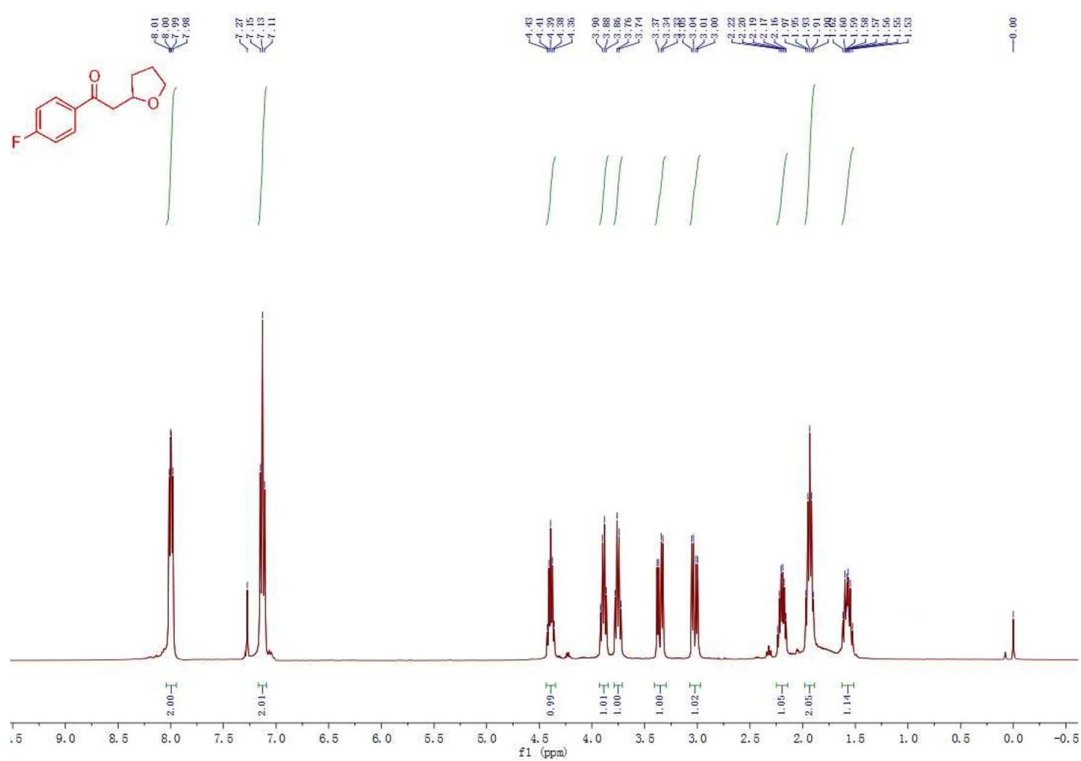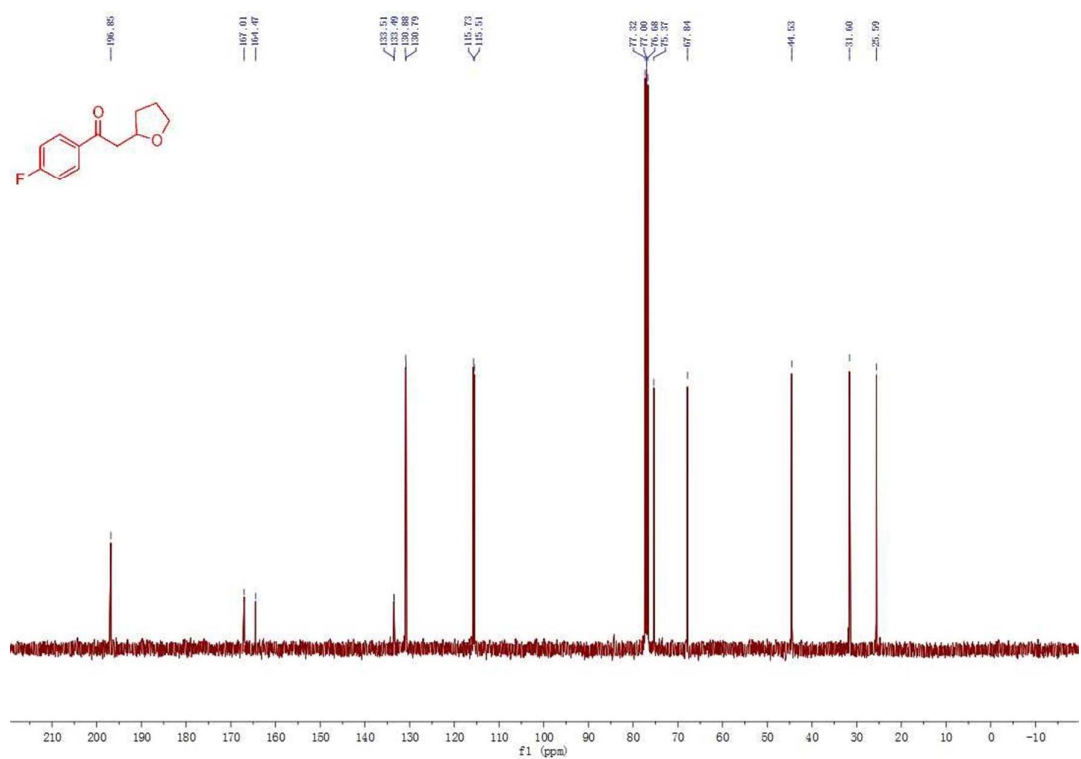

# NMR Spectra for 3ca

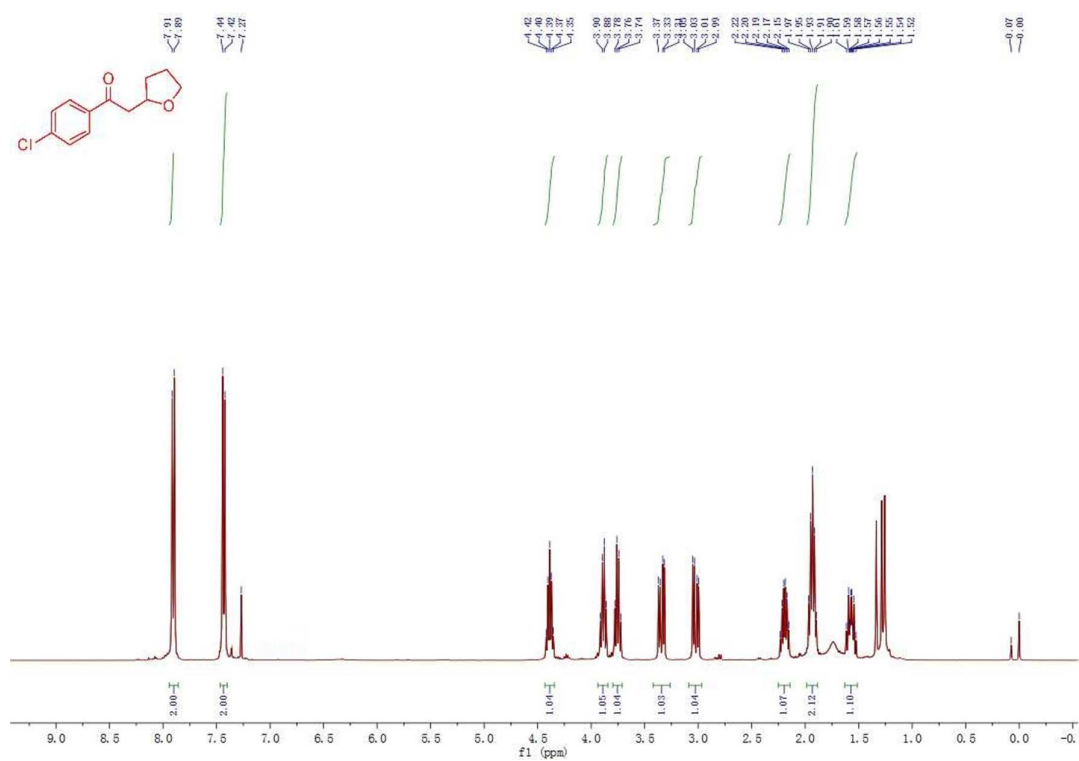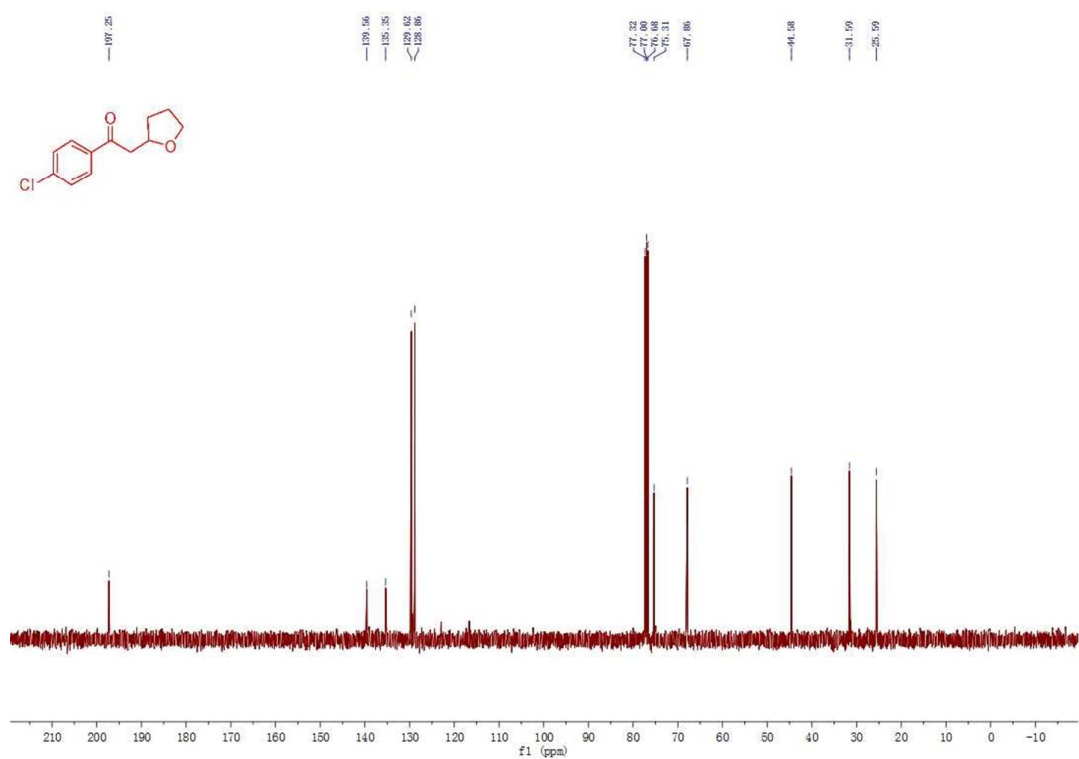

# NMR Spectra for 3da

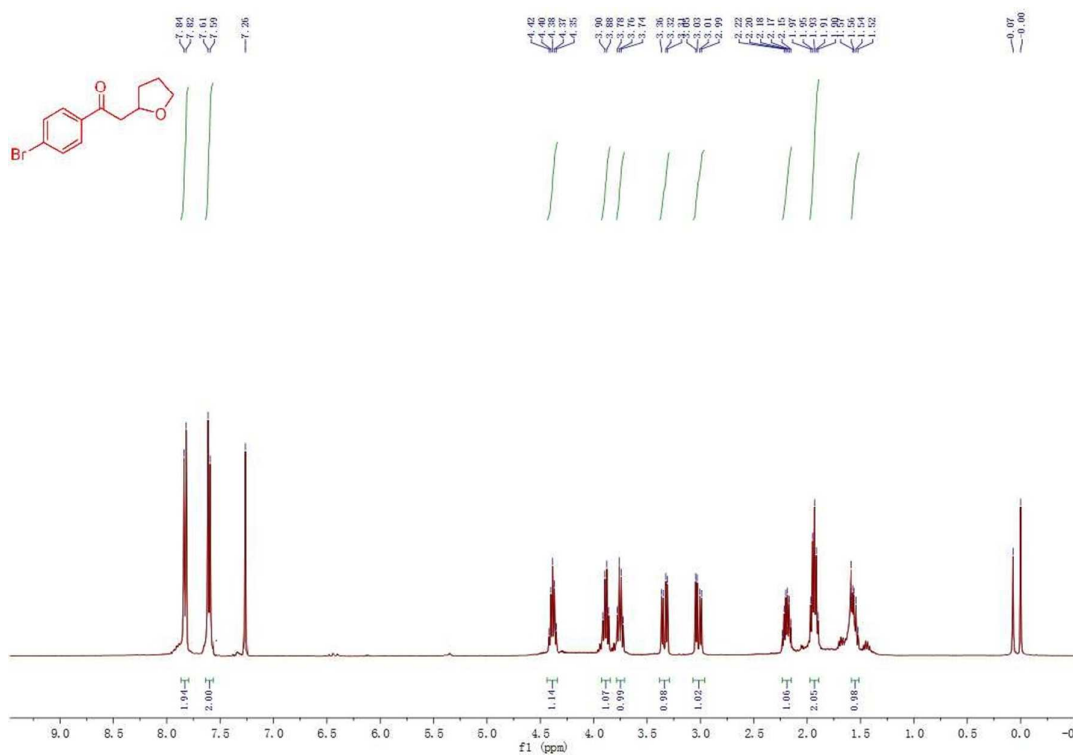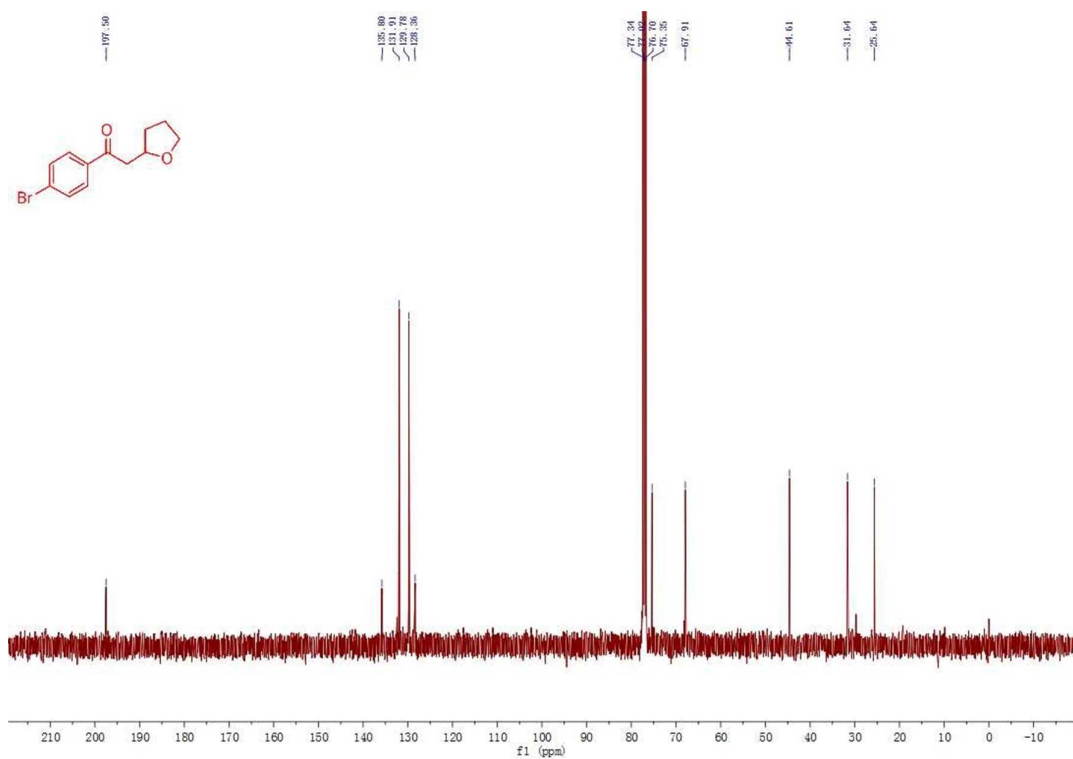



# NMR Spectra for 3ea

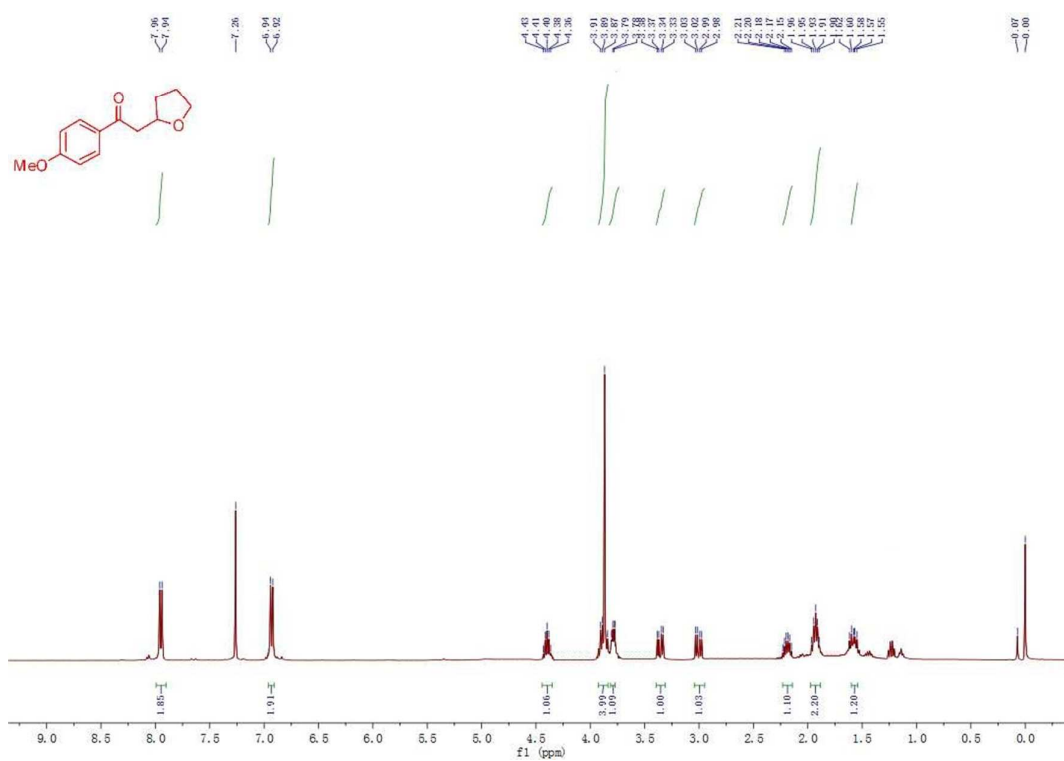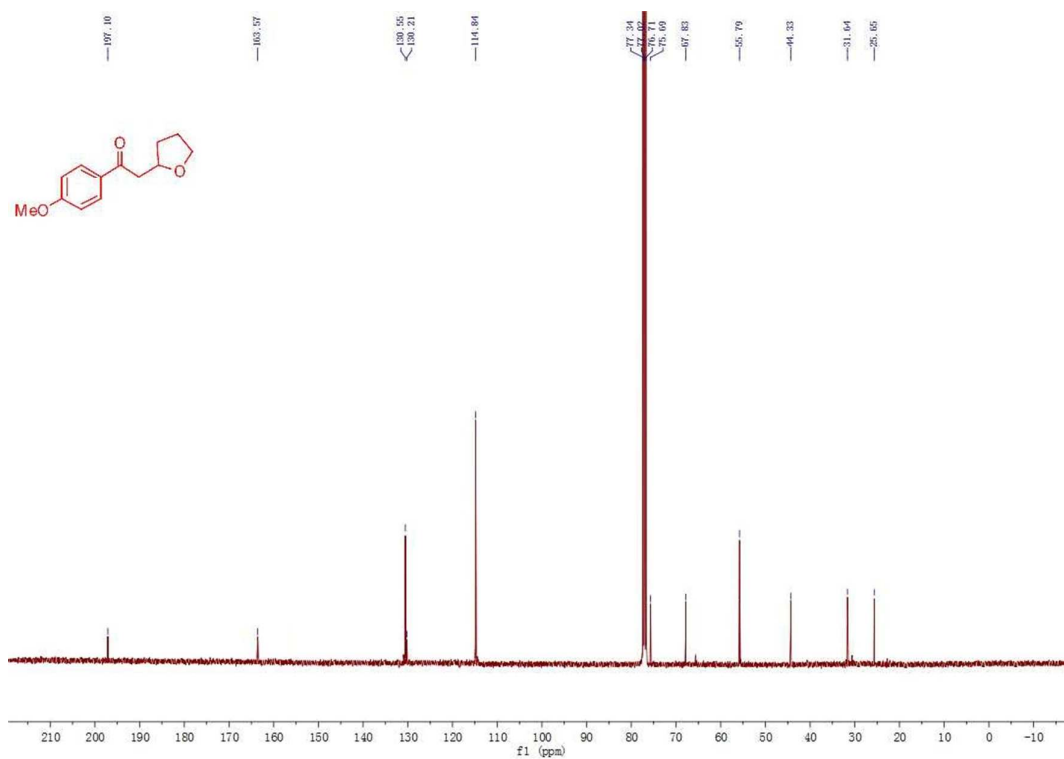

# NMR Spectra for 3fa

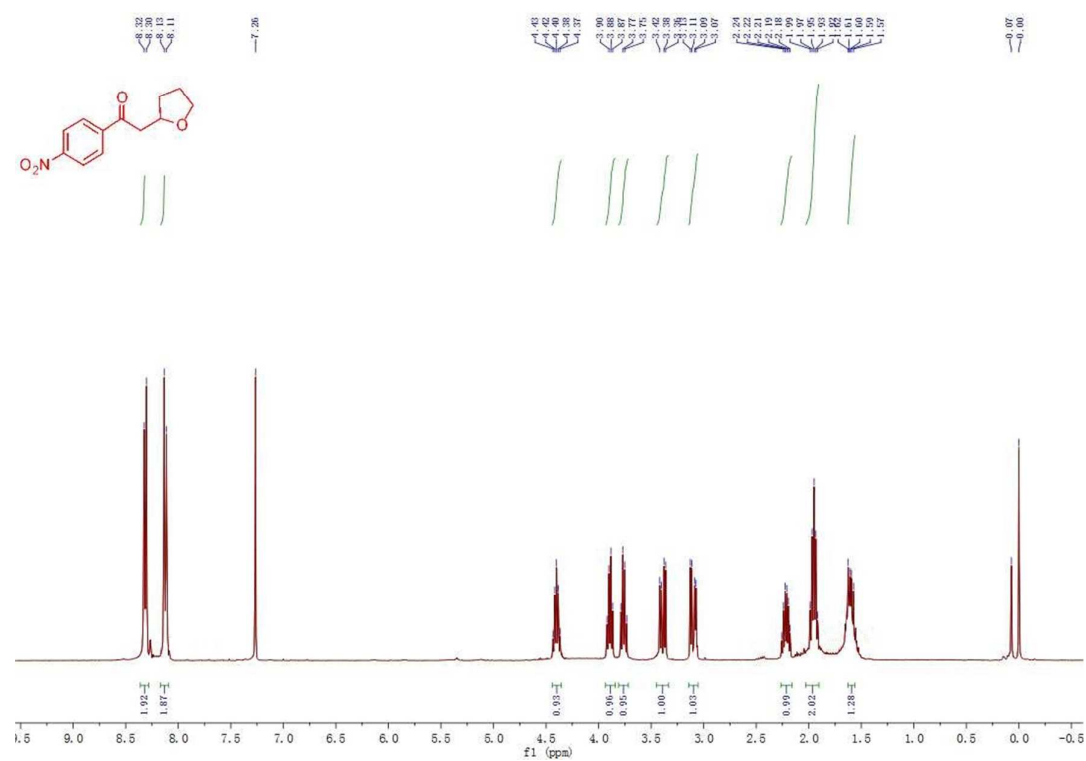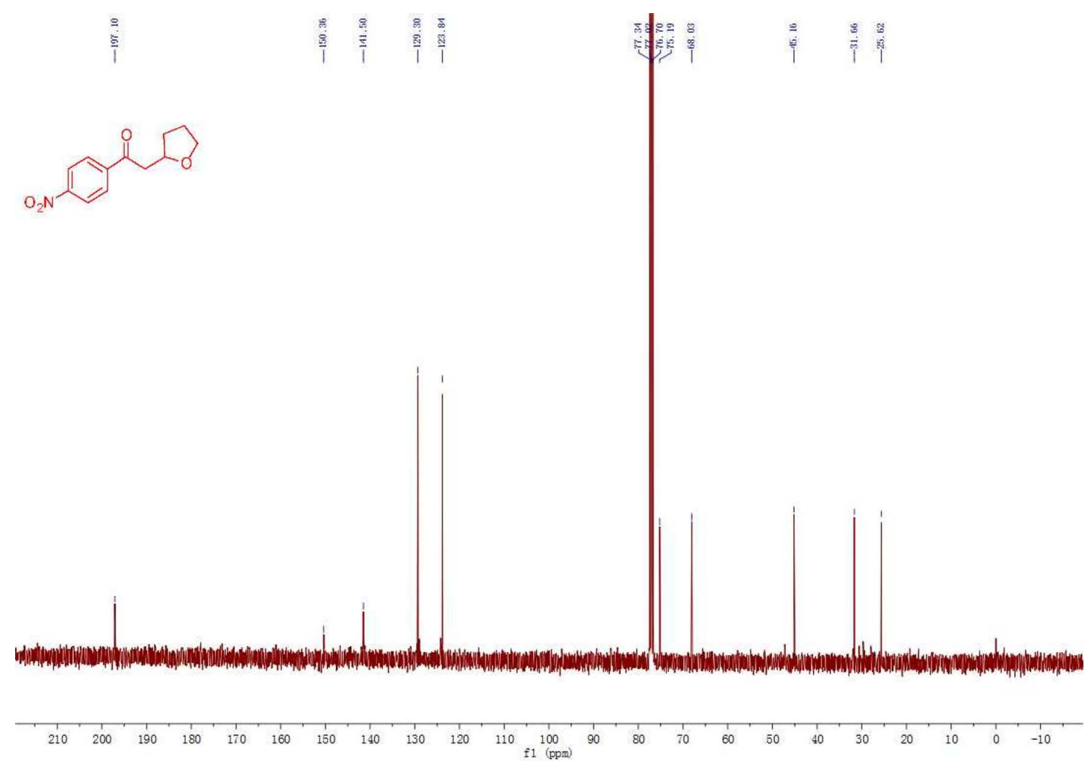

# NMR Spectra for 3ga

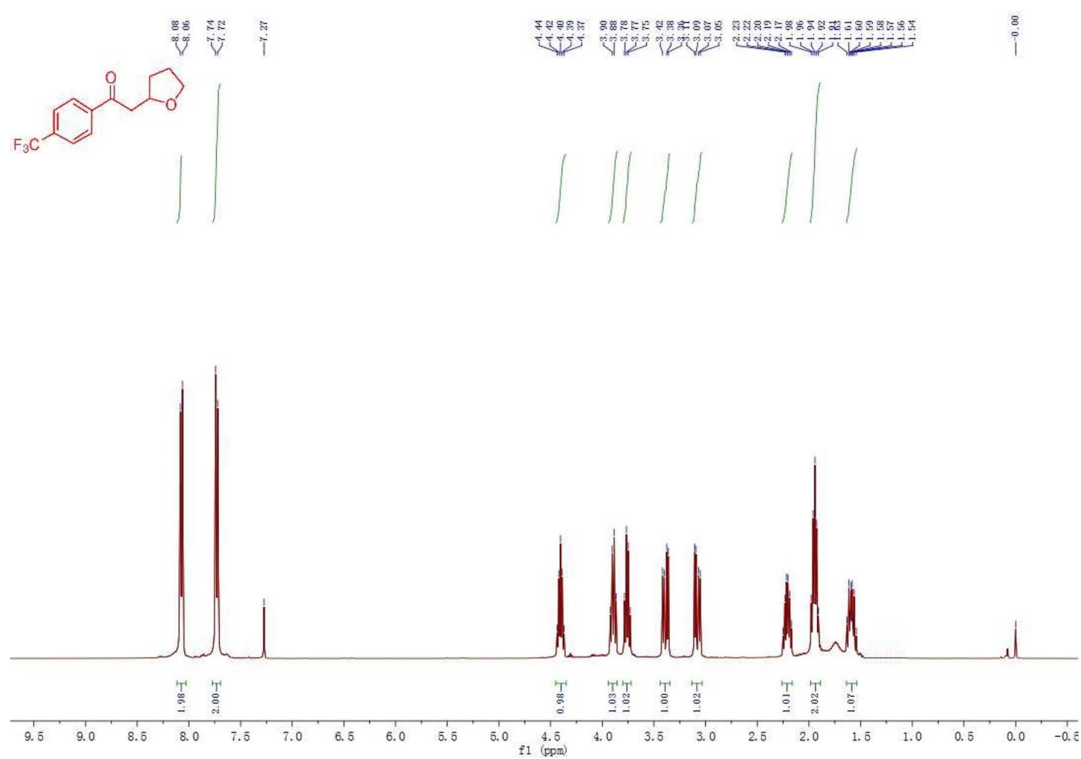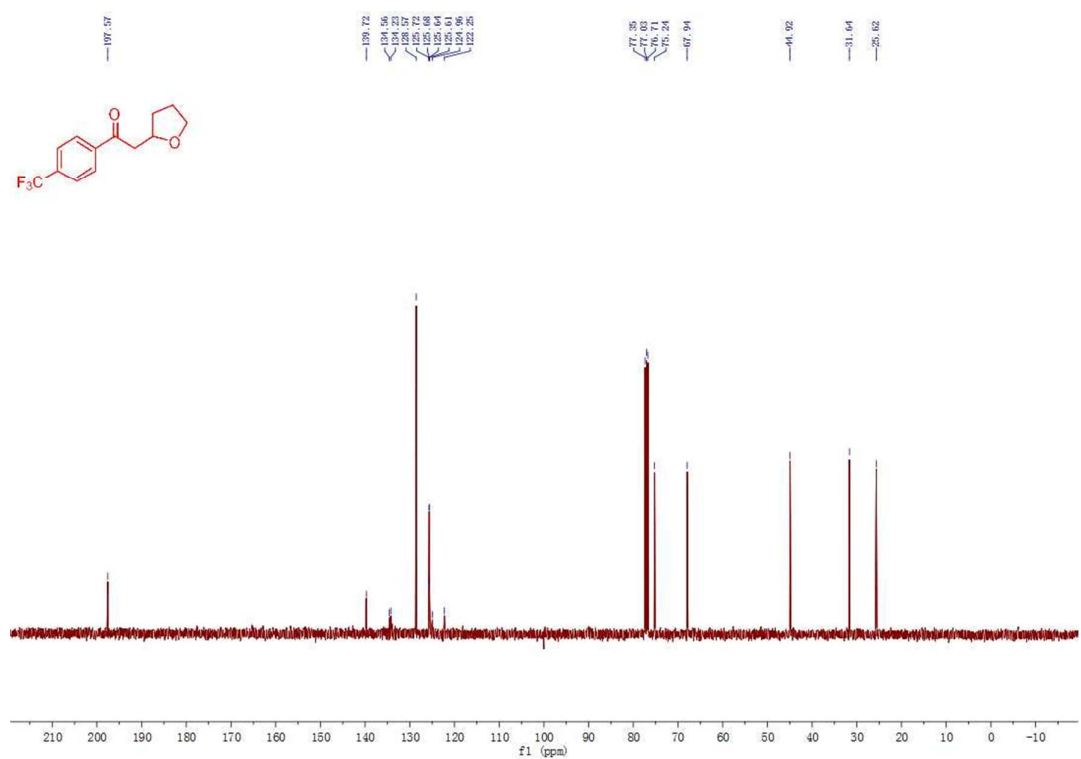

# NMR Spectra for 3ha

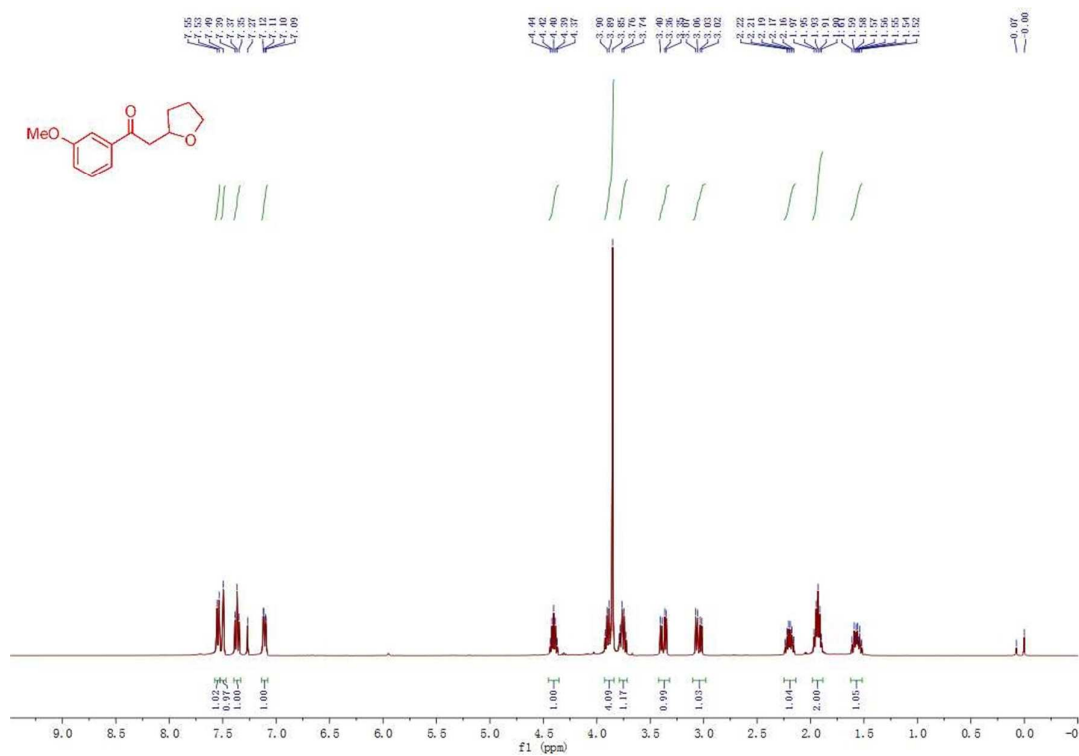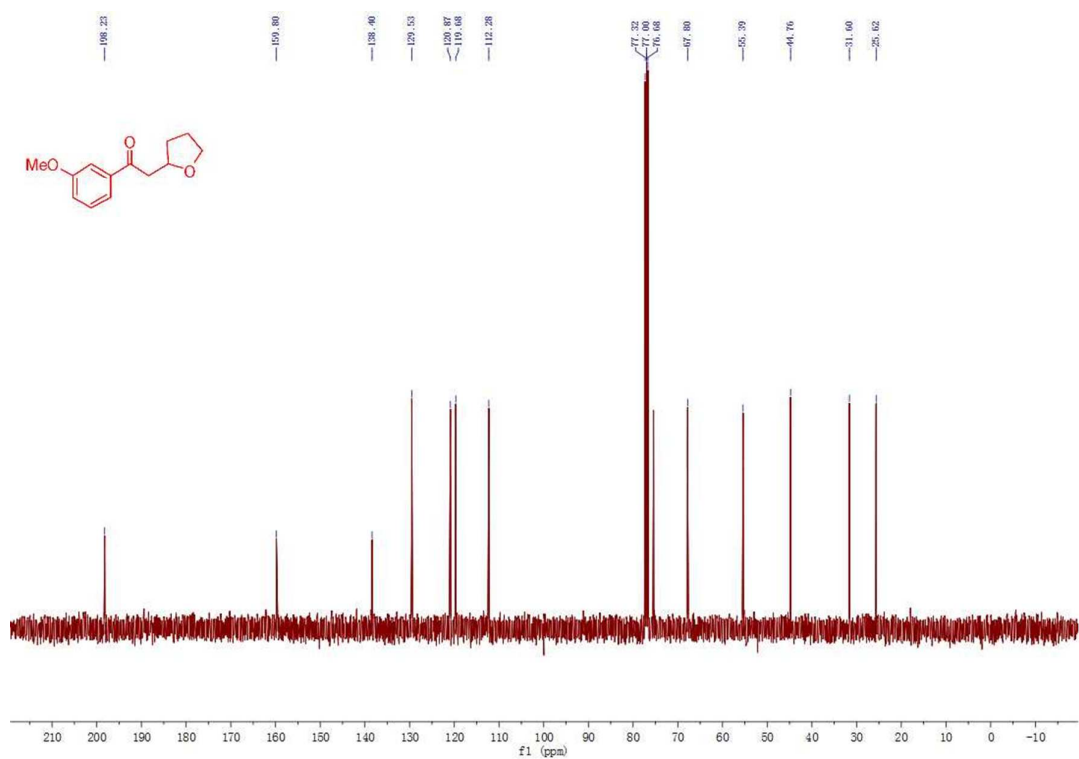

# NMR Spectra for 3ia

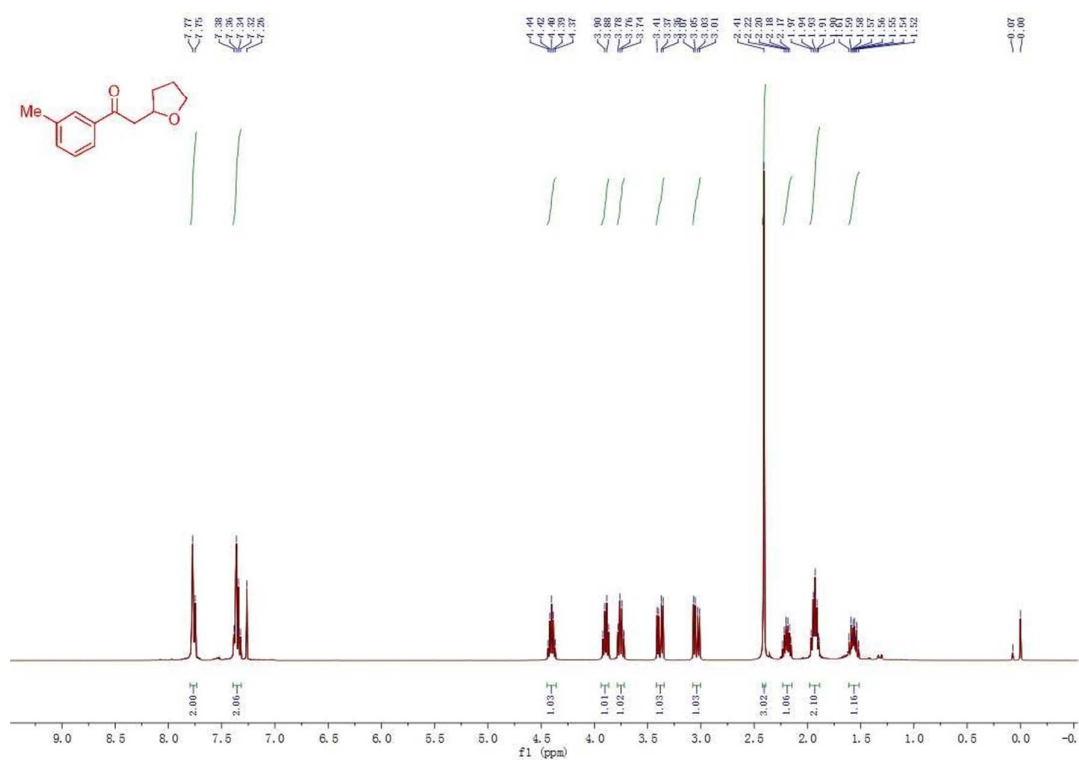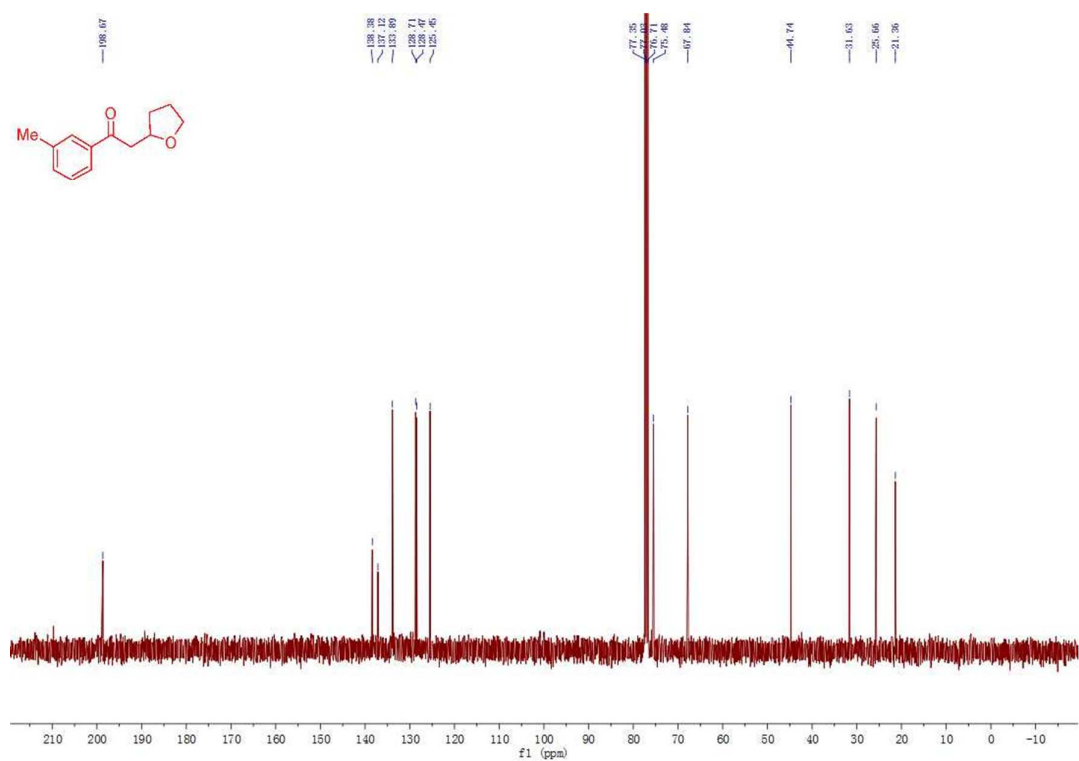

# NMR Spectra for 3ja

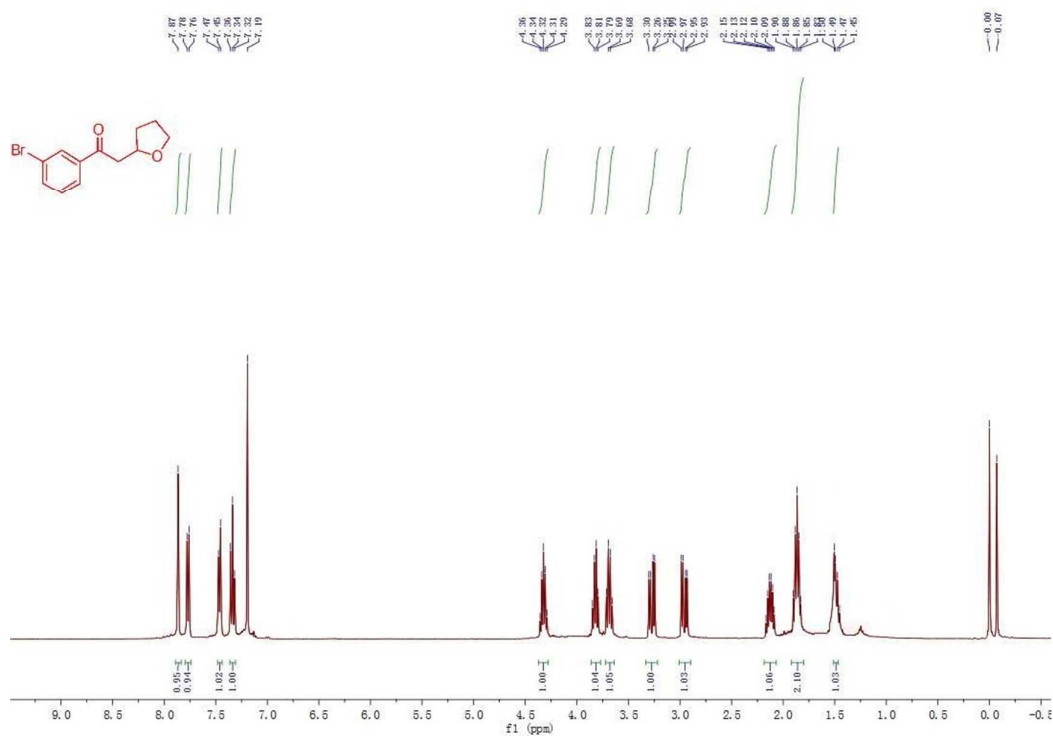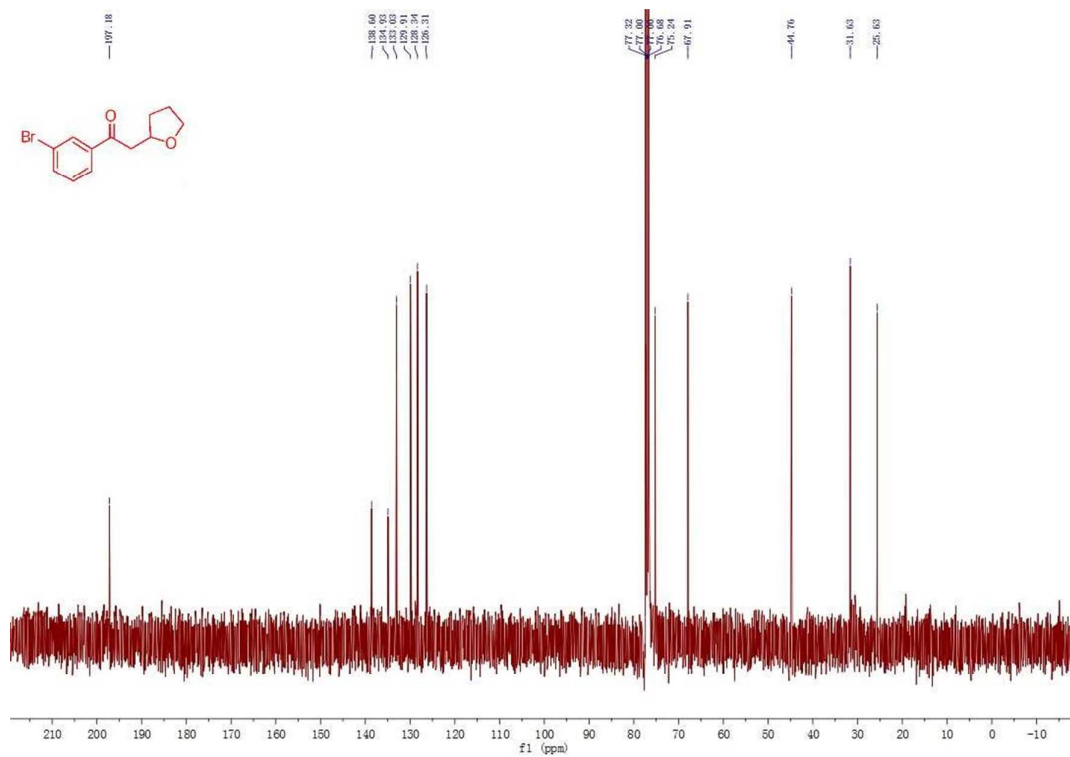

# NMR Spectra for 3ka

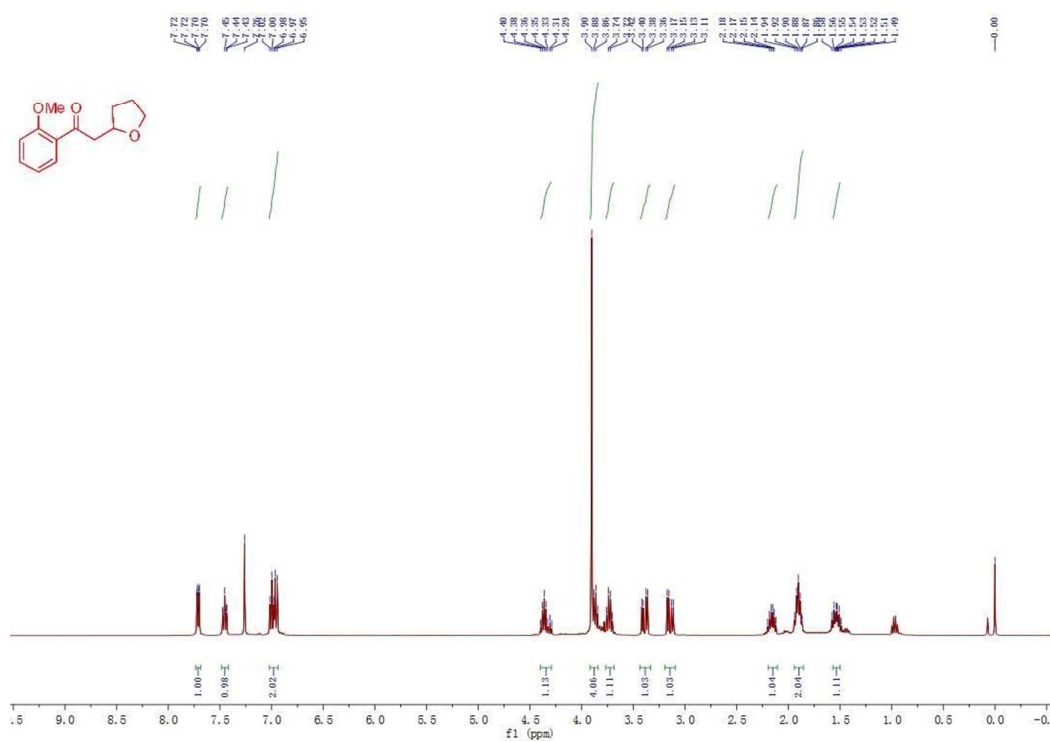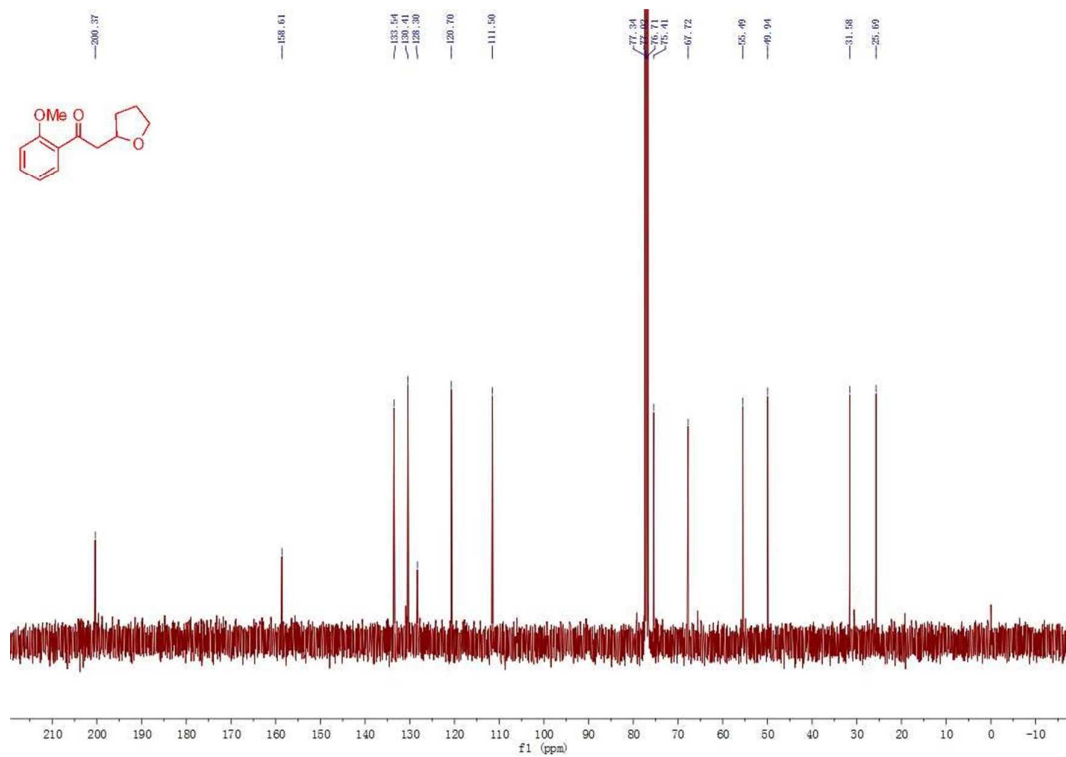

# NMR Spectra for 3ma

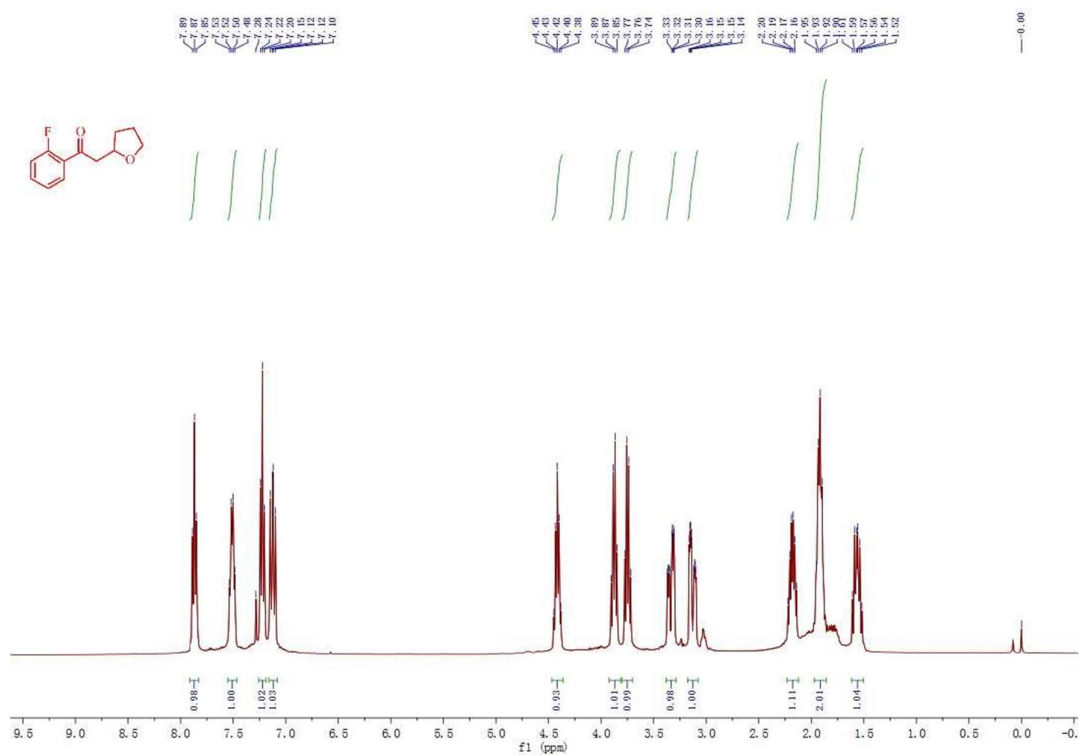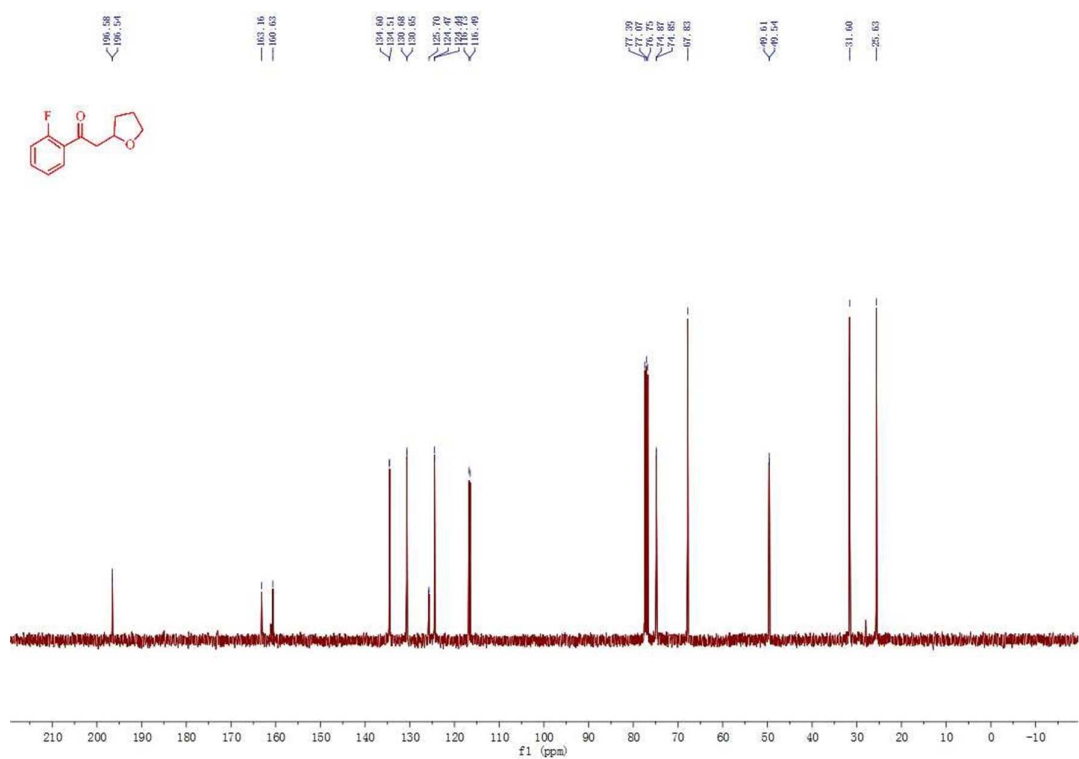



Chemical structure: Clc1ccccc1C(=O)OCCOC(=O)C

<sup>1</sup>H NMR spectrum (CDCl<sub>3</sub>) showing peaks in the aromatic region (7.2-7.6 ppm) and aliphatic region (1.5-2.5 ppm). Integration values are provided below the peaks.

| Chemical Shift (ppm) | Integration |
|----------------------|-------------|
| 7.50                 | 1.00        |
| 7.45                 | 1.03        |
| 7.40                 | 1.27        |
| 7.35                 | 1.00        |
| 7.30                 | 1.03        |
| 7.25                 | 1.00        |
| 7.20                 | 1.03        |
| 7.15                 | 1.00        |
| 7.10                 | 1.03        |
| 7.05                 | 1.00        |
| 7.00                 | 1.03        |
| 6.95                 | 1.00        |
| 6.90                 | 1.03        |
| 6.85                 | 1.00        |
| 6.80                 | 1.03        |
| 6.75                 | 1.00        |
| 6.70                 | 1.03        |
| 6.65                 | 1.00        |
| 6.60                 | 1.03        |
| 6.55                 | 1.00        |
| 6.50                 | 1.03        |
| 6.45                 | 1.00        |
| 6.40                 | 1.03        |
| 6.35                 | 1.00        |
| 6.30                 | 1.03        |
| 6.25                 | 1.00        |
| 6.20                 | 1.03        |
| 6.15                 | 1.00        |
| 6.10                 | 1.03        |
| 6.05                 | 1.00        |
| 6.00                 | 1.03        |
| 5.95                 | 1.00        |
| 5.90                 | 1.03        |
| 5.85                 | 1.00        |
| 5.80                 | 1.03        |
| 5.75                 | 1.00        |
| 5.70                 | 1.03        |
| 5.65                 | 1.00        |
| 5.60                 | 1.03        |
| 5.55                 | 1.00        |
| 5.50                 | 1.03        |
| 5.45                 | 1.00        |
| 5.40                 | 1.03        |
| 5.35                 | 1.00        |
| 5.30                 | 1.03        |
| 5.25                 | 1.00        |
| 5.20                 | 1.03        |
| 5.15                 | 1.00        |
| 5.10                 | 1.03        |
| 5.05                 | 1.00        |
| 5.00                 | 1.03        |
| 4.95                 | 1.00        |
| 4.90                 | 1.03        |
| 4.85                 | 1.00        |
| 4.80                 | 1.03        |
| 4.75                 | 1.00        |
| 4.70                 | 1.03        |
| 4.65                 | 1.00        |
| 4.60                 | 1.03        |
| 4.55                 | 1.00        |
| 4.50                 | 1.03        |
| 4.45                 | 1.00        |
| 4.40                 | 1.03        |
| 4.35                 | 1.00        |
| 4.30                 | 1.03        |
| 4.25                 | 1.00        |
| 4.20                 | 1.03        |
| 4.15                 | 1.00        |
| 4.10                 | 1.03        |
| 4.05                 | 1.00        |
| 4.00                 | 1.03        |
| 3.95                 | 1.00        |
| 3.90                 | 1.03        |
| 3.85                 | 1.00        |
| 3.80                 | 1.03        |
| 3.75                 | 1.00        |
| 3.70                 | 1.03        |
| 3.65                 | 1.00        |
| 3.60                 | 1.03        |
| 3.55                 | 1.00        |
| 3.50                 | 1.03        |
| 3.45                 | 1.00        |
| 3.40                 | 1.03        |
| 3.35                 | 1.00        |
| 3.30                 | 1.03        |
| 3.25                 | 1.00        |
| 3.20                 | 1.03        |
| 3.15                 | 1.00        |
| 3.10                 | 1.03        |
| 3.05                 | 1.00        |
| 3.00                 | 1.03        |
| 2.95                 | 1.00        |
| 2.90                 | 1.03        |
| 2.85                 | 1.00        |
| 2.80                 | 1.03        |
| 2.75                 | 1.00        |
| 2.70                 | 1.03        |
| 2.65                 | 1.00        |
| 2.60                 | 1.03        |
| 2.55                 | 1.00        |
| 2.50                 | 1.03        |
| 2.45                 | 1.00        |
| 2.40                 | 1.03        |
| 2.35                 | 1.00        |
| 2.30                 | 1.03        |
| 2.25                 | 1.00        |
| 2.20                 | 1.03        |
| 2.15                 | 1.00        |
| 2.10                 | 1.03        |
| 2.05                 | 1.00        |
| 2.00                 | 1.03        |
| 1.95                 | 1.00        |
| 1.90                 | 1.03        |
| 1.85                 | 1.00        |
| 1.80                 | 1.03        |
| 1.75                 | 1.00        |
| 1.70                 | 1.03        |
| 1.65                 | 1.00        |
| 1.60                 | 1.03        |
| 1.55                 | 1.00        |
| 1.50                 | 1.03        |
| 1.45                 | 1.00        |
| 1.40                 | 1.03        |
| 1.35                 | 1.00        |
| 1.30                 | 1.03        |
| 1.25                 | 1.00        |
| 1.20                 | 1.03        |
| 1.15                 | 1.00        |
| 1.10                 | 1.03        |
| 1.05                 | 1.00        |
| 1.00                 | 1.03        |
| 0.95                 | 1.00        |
| 0.90                 | 1.03        |
| 0.85                 | 1.00        |
| 0.80                 | 1.03        |
| 0.75                 | 1.00        |
| 0.70                 | 1.03        |
| 0.65                 | 1.00        |
| 0.60                 | 1.03        |
| 0.55                 | 1.00        |
| 0.50                 | 1.03        |
| 0.45                 | 1.00        |
| 0.40                 | 1.03        |
| 0.35                 | 1.00        |
| 0.30                 | 1.03        |
| 0.25                 | 1.00        |
| 0.20                 | 1.03        |
| 0.15                 | 1.00        |
| 0.10                 | 1.03        |
| 0.05                 | 1.00        |
| 0.00                 | 1.03        |

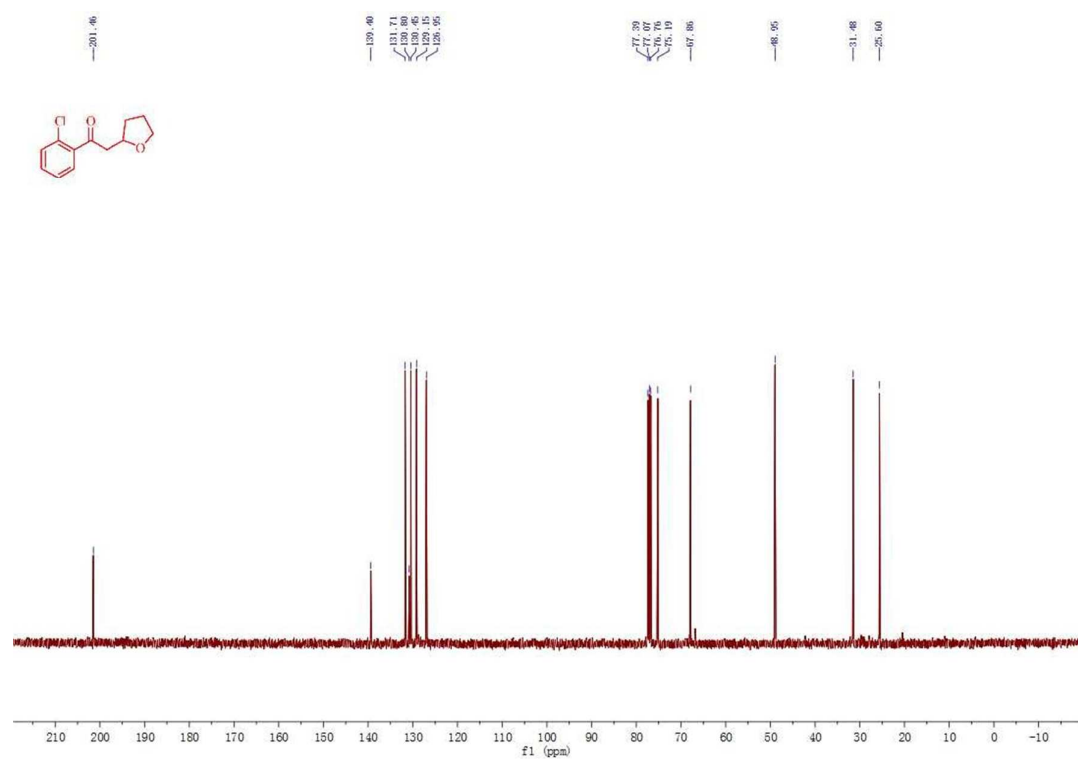

# NMR Spectra for 3pa

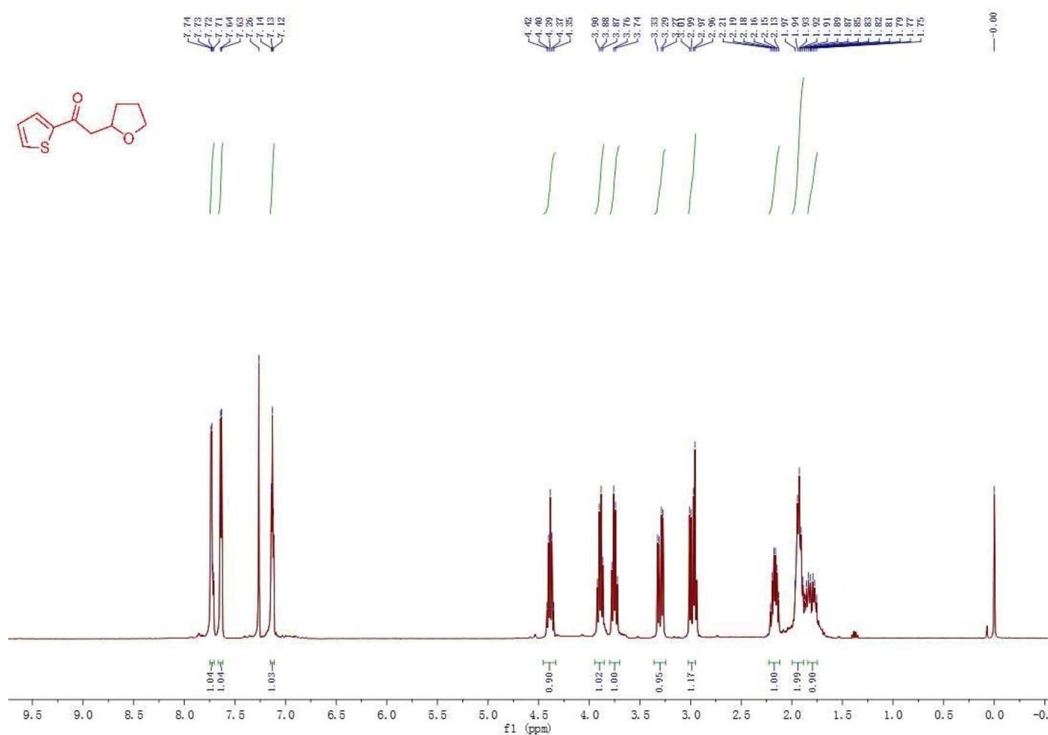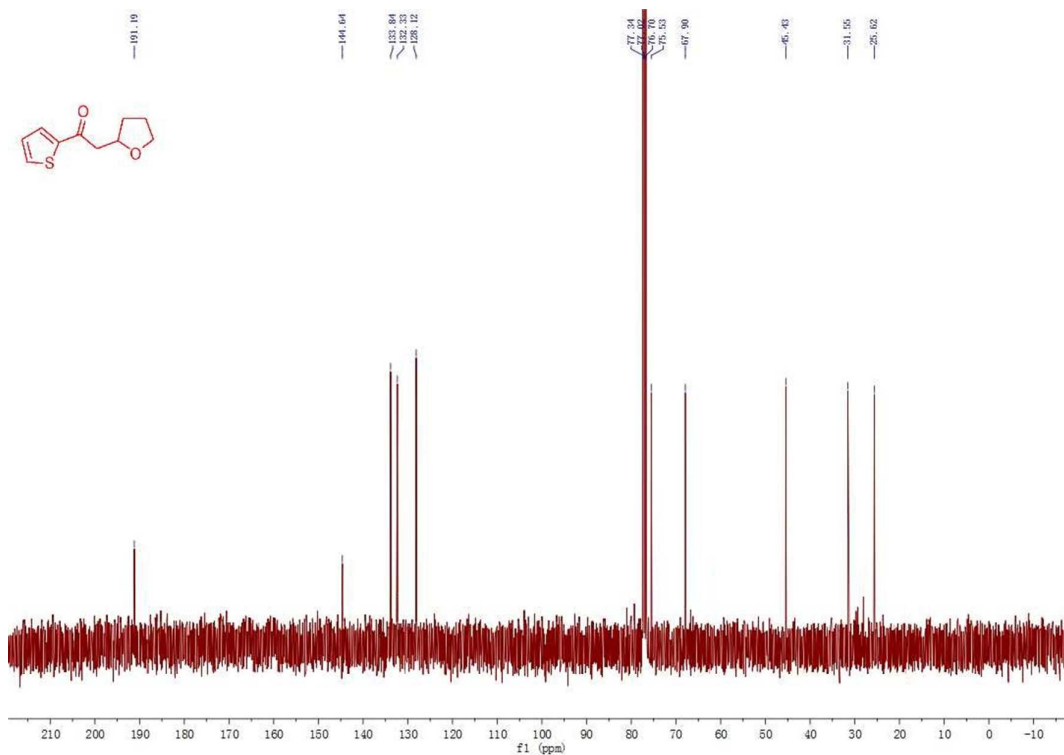

# NMR Spectra for 3ad

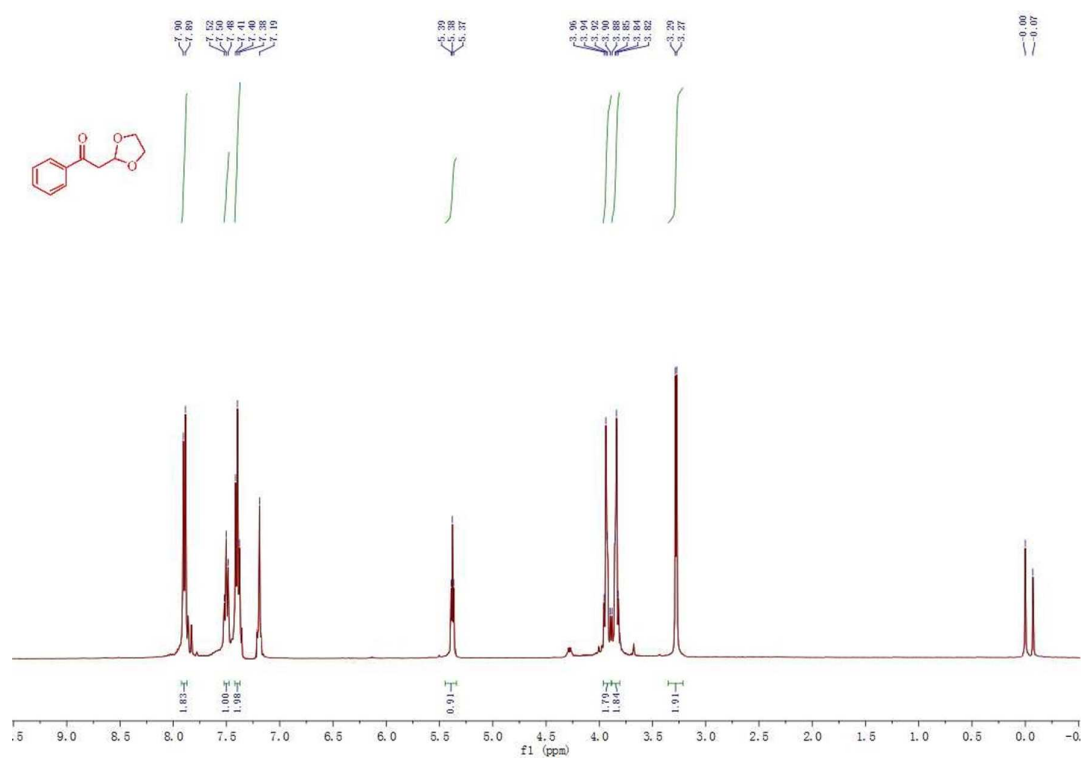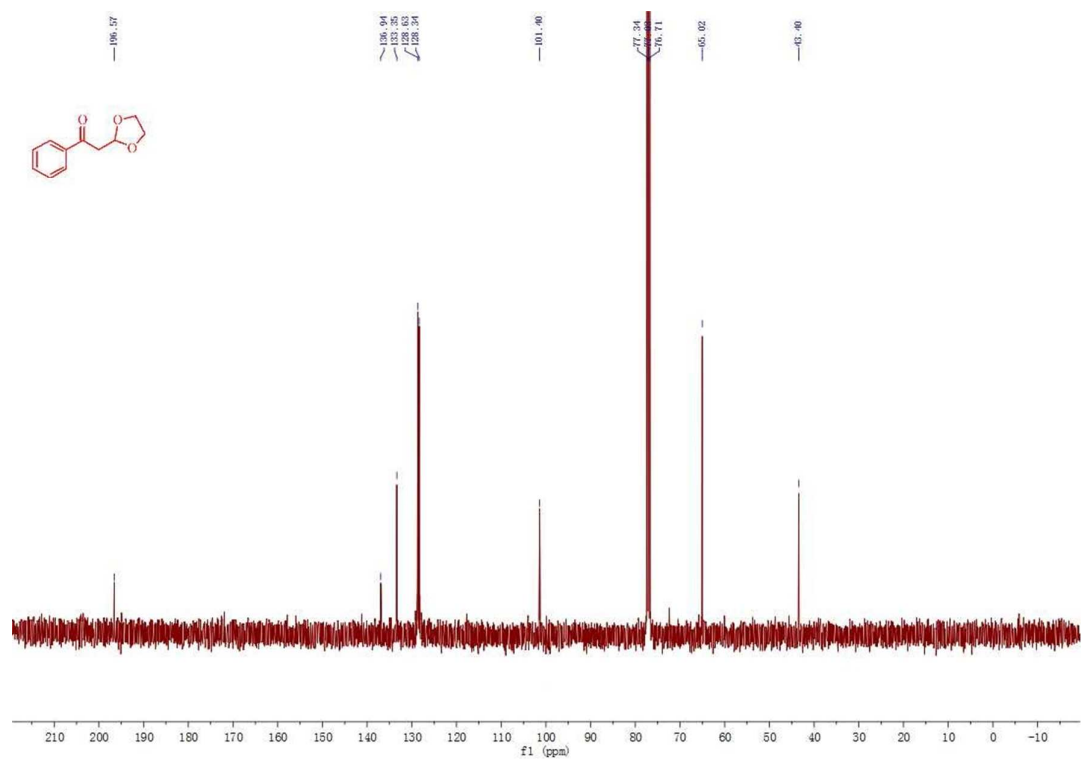

# NMR Spectra for 3af

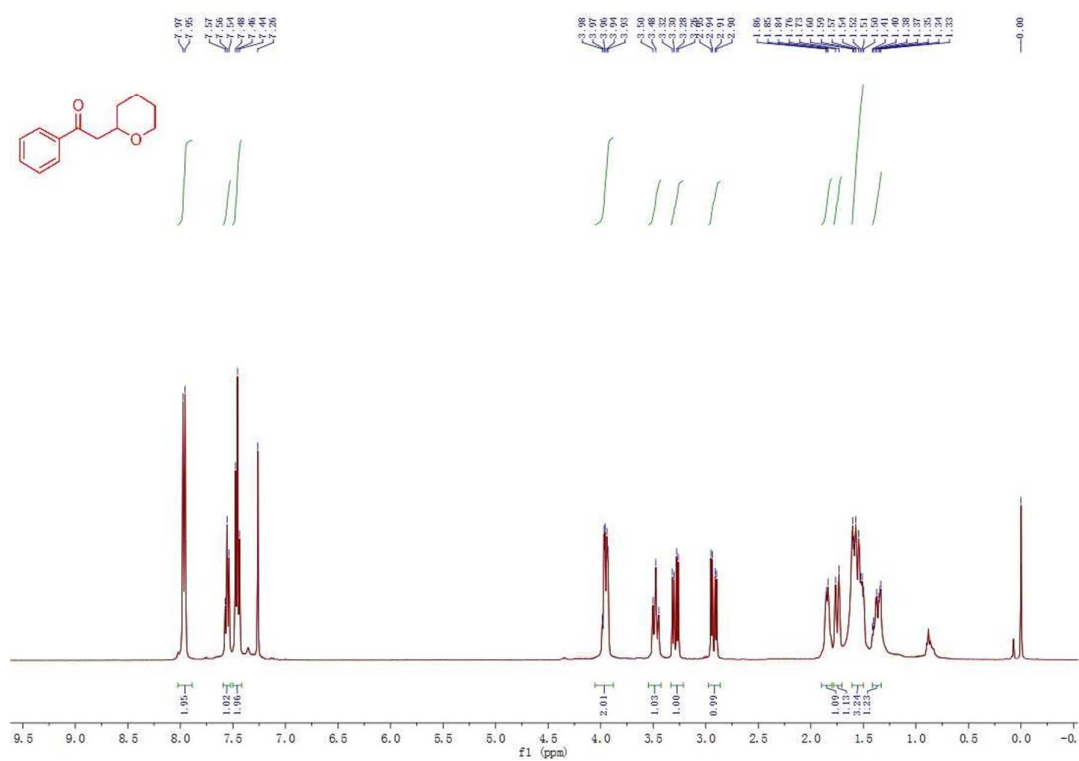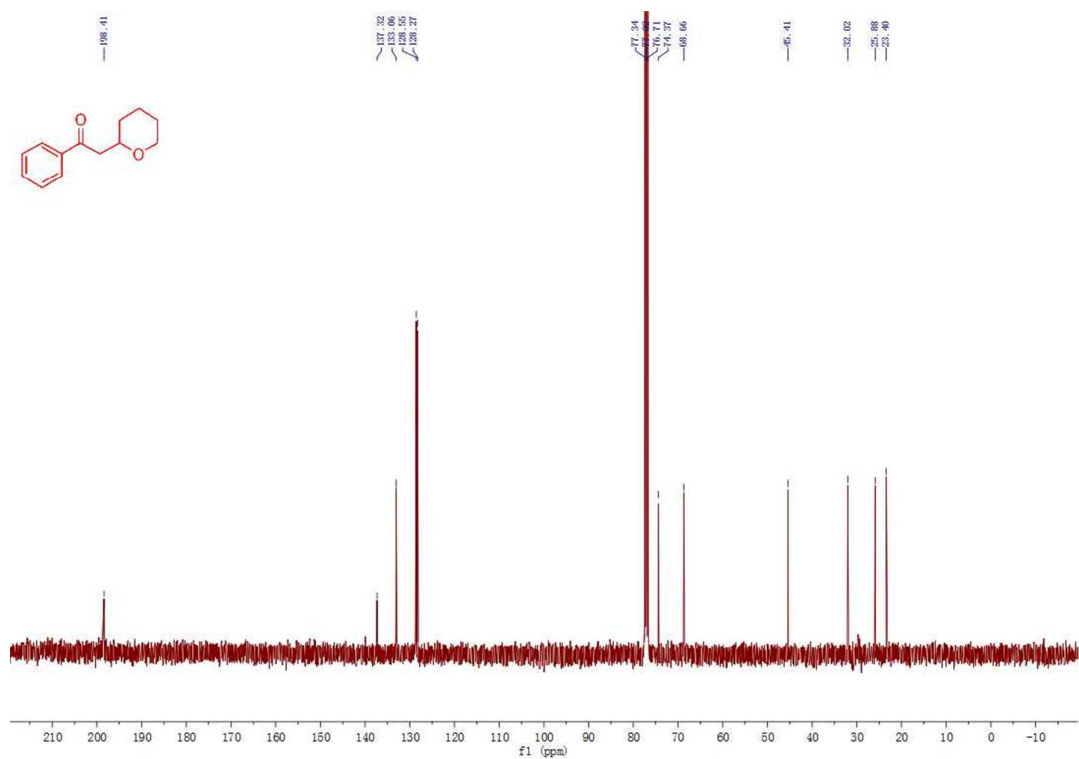

# NMR Spectra for 3ag

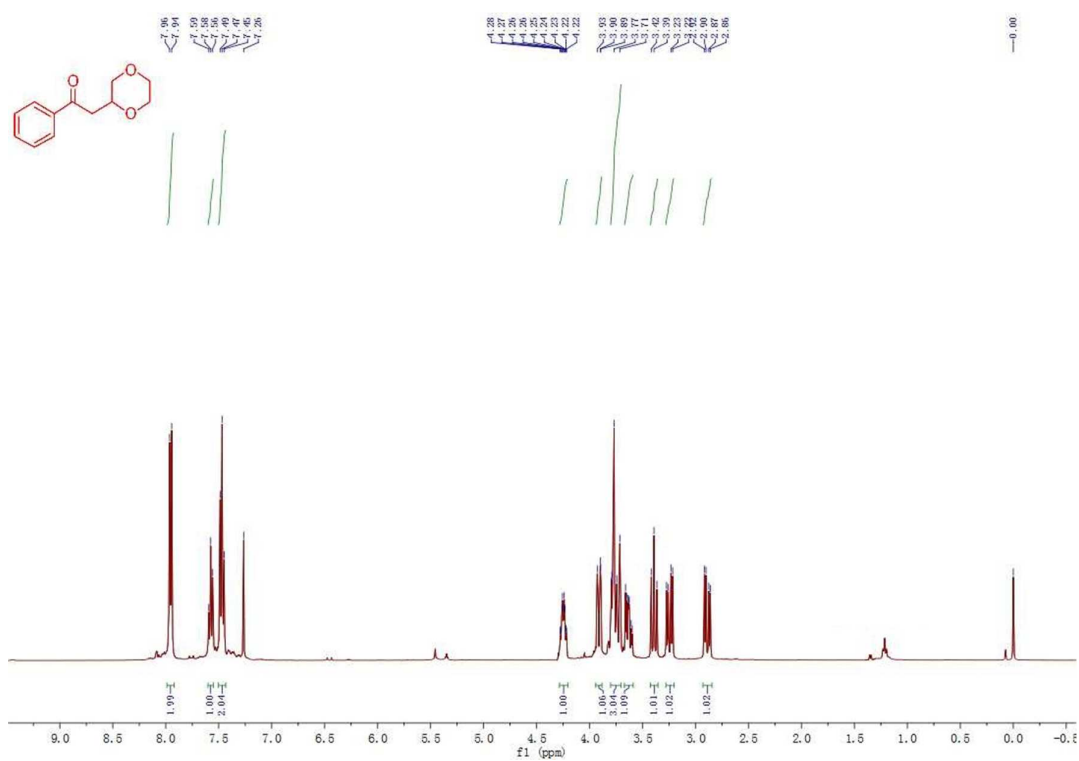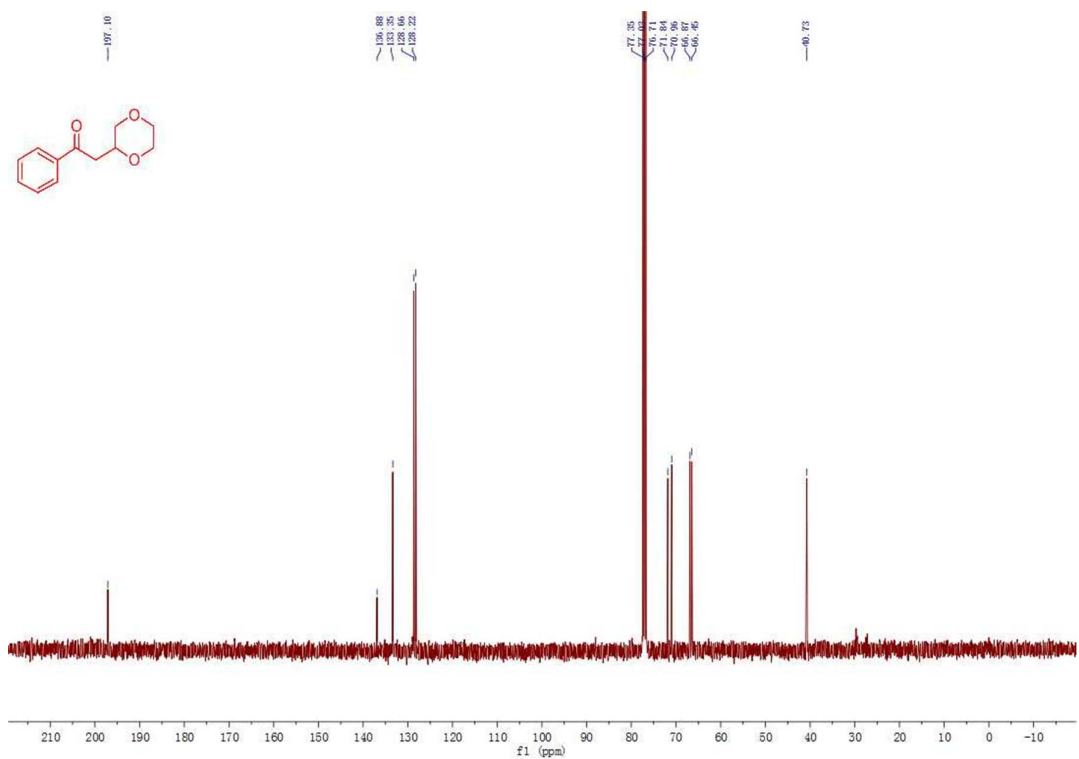

Supplement: Supplementary file 1 [file 7677247]
